# Supplementary material
Source: PubMed Central journal article supplement (PMC8832894)
Supplement: tpmd210686.SD1.pdf [file tpmd210686.SD1.pdf]

**Supplemental Table S1: Student to toilet ratios for surveyed schools**

| School   | Total Student Population | Boys to Girls Ratio | Student Accessibility to School Toilets |      | Student to Toilet Ratio for all Available Toilets |                    |
|----------|--------------------------|---------------------|-----------------------------------------|------|---------------------------------------------------|--------------------|
|          |                          |                     | Boy                                     | Girl | Boy                                               | Girl               |
| GS 1     | 330                      | 160:170             | -                                       | -    | 160:0                                             | 170:0              |
| GS 2     | 503                      | 244:259             | Yes                                     | Yes  | 244:4 <sup>a</sup>                                | 259:4 <sup>a</sup> |
| GS 3     | 295                      | 195:100             | No                                      | No   | 195:1 <sup>b</sup>                                | 100:1 <sup>b</sup> |
| GS 4     | 1338                     | 647:691             | Yes                                     | Yes  | 647:1 <sup>c</sup>                                | 691:1 <sup>c</sup> |
| GS 5     | 565                      | 275:290             | -                                       | -    | 275:0                                             | 290:0              |
| PS 1     | 525                      | 289:236             | Yes                                     | Yes  | 289:1                                             | 236:1              |
| PS 2     | 60                       | 30:30               | Yes                                     | Yes  | 30:1                                              | 30:1               |
| PS 3     | 212                      | 101:111             | Yes                                     | Yes  | 101:4                                             | 111:4              |
| PS 4     | 120                      | 54:66               | Yes                                     | Yes  | 54:1                                              | 66:1               |
| PS 5     | 93                       | 43:50               | Yes                                     | Yes  | *93:1 <sup>d</sup>                                |                    |
|          |                          |                     | <b>Functional Toilets Only</b>          |      | <b>Student to Toilet Ratio</b>                    |                    |
| Total GS | 3031                     | 1521:1510           | 0                                       | 0    | 1521:0                                            | 1510:0             |
| Total PS | 1010                     | 517:493             | 7                                       | 7    | 74:1                                              | 70:1               |

*Student accessibility to school toilet- determines whether school toilets are open to students round-the-clock (i.e not locked or sealed); GS- Government school; PS- Private school; a: toilet is unimproved (pit latrine), with zero water facility; b: toilet is inaccessible to students, hence not functional; c: toilet is blocked and non-functional; d: toilet is common use i.e not segregated by sex*

**Supplemental Table S2: Mean sanitation-related psychosocial stressor levels across the selected schools**

| School | Mean stressor level | Standard deviation | Minimum stressor level | Maximum stressor level |
|--------|---------------------|--------------------|------------------------|------------------------|
| GS1    | 15.481              | 6.891              | 4.000                  | 32.000                 |
| GS2    | 17.660              | 6.853              | 0.000                  | 35.000                 |
| GS3    | 15.689              | 9.004              | 0.000                  | 44.000                 |
| GS4    | 19.667              | 6.890              | 0.000                  | 37.000                 |
| GS5    | 16.450              | 9.412              | 0.000                  | 51.000                 |
| PS1    | 9.667               | 6.346              | 1.000                  | 20.000                 |
| PS2    | 14.000              | 3.000              | 9.000                  | 19.000                 |
| PS3    | 12.769              | 5.904              | 4.000                  | 21.000                 |
| PS4    | 8.391               | 4.500              | 0.000                  | 18.000                 |
| PS5    | 13.132              | 5.581              | 2.000                  | 25.000                 |

**Supplemental Table S3: Predictors of the students' sanitation-related stressors**

| Predictor variables   | Standardized coefficient ( $\beta$ ) | Adjusted odds ratio | 95% Confidence interval | p-value |
|-----------------------|--------------------------------------|---------------------|-------------------------|---------|
| Constant              | 1.974                                | 28.300              | 7.288 to 109.901        | < .001  |
| Student:toilet ratio  | -2.468                               | 0.996               | 0.994 to 0.999          | 0.004   |
| School type (Private) | -0.873                               | 0.085               | 0.022 to 0.324          | < .001  |

*Note.* Stress cat level 'Moderate to severe stressors' coded as class 1.

**Supplemental Table S4: Implications of school WASH facilities on the students**

| Impact of school WASH facilities (N=382)                                                                                   | Yes (%)    |
|----------------------------------------------------------------------------------------------------------------------------|------------|
| <b>School absenteeism due to the condition of WASH facilities</b>                                                          | 183 (47.9) |
| <b>Frequency of absenteeism</b>                                                                                            |            |
| Once every week                                                                                                            | 79 (20.6)  |
| Once biweekly                                                                                                              | 34 (9.0)   |
| Once a month                                                                                                               | 10 (2.5)   |
| At least once during the term                                                                                              | 45 (11.8)  |
| Random times each term                                                                                                     | 15 (4.0)   |
| <b>Major Reasons for Absenteeism</b>                                                                                       |            |
| No water at school toilets                                                                                                 | 82 (21.4)  |
| Poor condition of school toilets                                                                                           | 48 (12.6)  |
| No soap at WHS                                                                                                             | 84 (22.1)  |
| No private washing facility and absence of sanitary bins                                                                   | 46 (12.1)  |
| <b>(For Girls) School absenteeism during menstrual period due to the conditions of school WASH facilities</b>              | 167 (43.8) |
| <b>(For Girls) Duration of absence</b>                                                                                     |            |
| N= 167                                                                                                                     |            |
| 1 to 2 days                                                                                                                | 122 (73.1) |
| 3 to 4 days                                                                                                                | 43 (25.8)  |
| Random                                                                                                                     | 2 (1.1)    |
| <b>Loss of learning hours via missed classes due to poor access to WASH services</b>                                       | 124 (32.5) |
| <b>Long urine/faeces holding durations at school due to the inability to use the school toilets due to their condition</b> | 251 (65.6) |
| <b>Inability to comfortably use school toilets due to absence of privacy</b>                                               | 239 (62.5) |
| <b>Forced practise of open defecation due to the conditions of the WASH facilities</b>                                     | 206 (53.8) |
| <b>Experienced a form of attack or accident during open defecation practice at school</b>                                  | N=206      |

|                                                                         |            |
|-------------------------------------------------------------------------|------------|
|                                                                         | 67 (32.7)  |
| <b>Subjected to fear/ashamed of being caught defecating in the open</b> | N=206      |
|                                                                         | 133 (64.5) |
| <b>Reported incidence of WASH-related diseases in the last session.</b> |            |
| Diarrhoea                                                               | 42 (11.1)  |
| Typhoid                                                                 | 58 (15.3)  |
| Malaria                                                                 | 191 (50.0) |
| Urogenital infection                                                    | 36 (9.3)   |
